# Supplementary material for: Novel non-terminal tumor sampling procedure using fine needle aspiration supports immuno-oncology biomarker discovery in preclinical mouse models
Source: PubMed Central journal article supplement — J Immunother Cancer. 2021 Jun 18;9(6):e002894. doi: 10.1136/jitc-2021-002894 (PMC8215240; doi:10.1136/jitc-2021-002894), 2021-06-18
Supplement: jitc-2021-002894supp002.pdf [file jitc-2021-002894supp002.pdf]

**Title:**

A novel non-terminal tumor sampling procedure using fine needle aspiration supports immunology biomarker discovery in preclinical mouse models

**Supplementary figures and figure legends:****Supplementary Figure 1**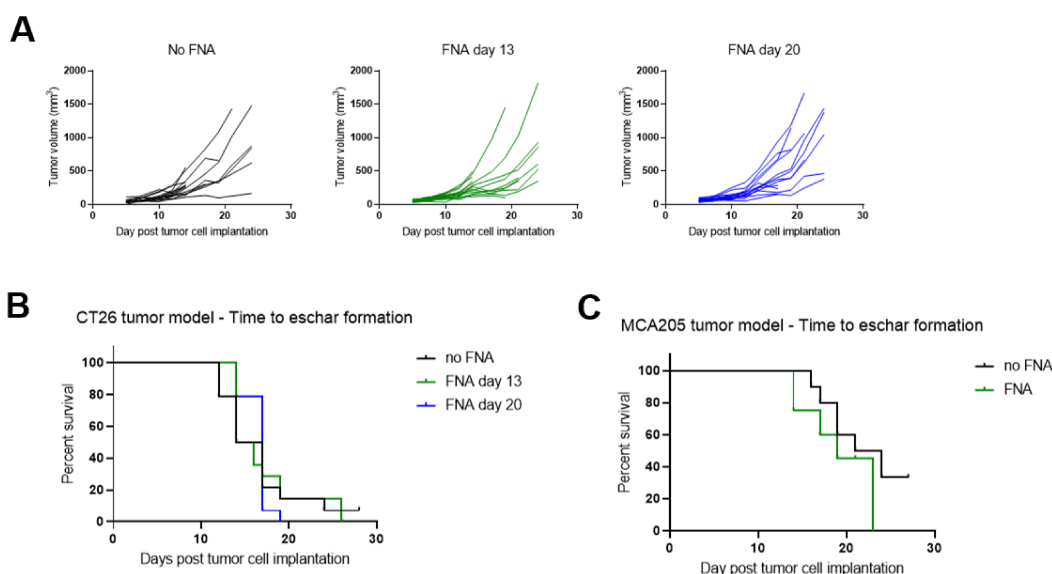**Supplementary Figure 1: Fine needle aspiration does not impact tumor growth or eschar formation**

(A and B) Mice were subcutaneously implanted with CT26 tumors on the flank and the tumors were biopsied using FNA either 13 or 20 days later. (A) Tumor growth of individual mice over time. (B) Time to eschar formation was compared between groups using a log-rank test. No significant differences were seen between FNA-biopsied and control groups. (C) Mice were subcutaneously implanted with MCA205 tumors on the flank and the tumors were biopsied using FNA 18 days later. Time to eschar formation was compared between groups using a log-rank test. No significant differences were seen between FNA-biopsied and control groups.

## Supplementary Figure 2

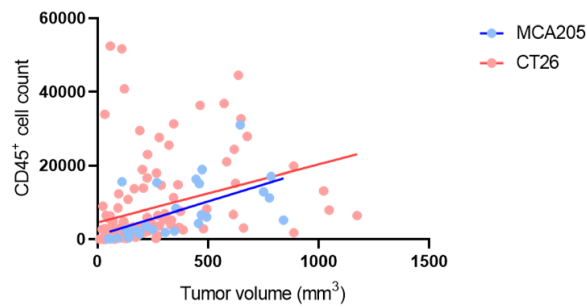**Supplementary Figure 2: Fine needle aspiration can be used to extract cells for flow cytometry at a range of tumor volumes**

FNA biopsies were collected from mice bearing either CT26 or MCA205 tumors and analysed by flow cytometry to determine the total number of CD45<sup>+</sup> tumor-infiltrating immune cells within the sample. This was plotted against the volume of the tumor on the day of FNA biopsying for each mouse and linear regression was used to calculate the correlation between the CD45<sup>+</sup> cell count and tumor volume for both tumor models, indicated by the solid lines. 27-124 mice per group.

## Supplementary Figure 3

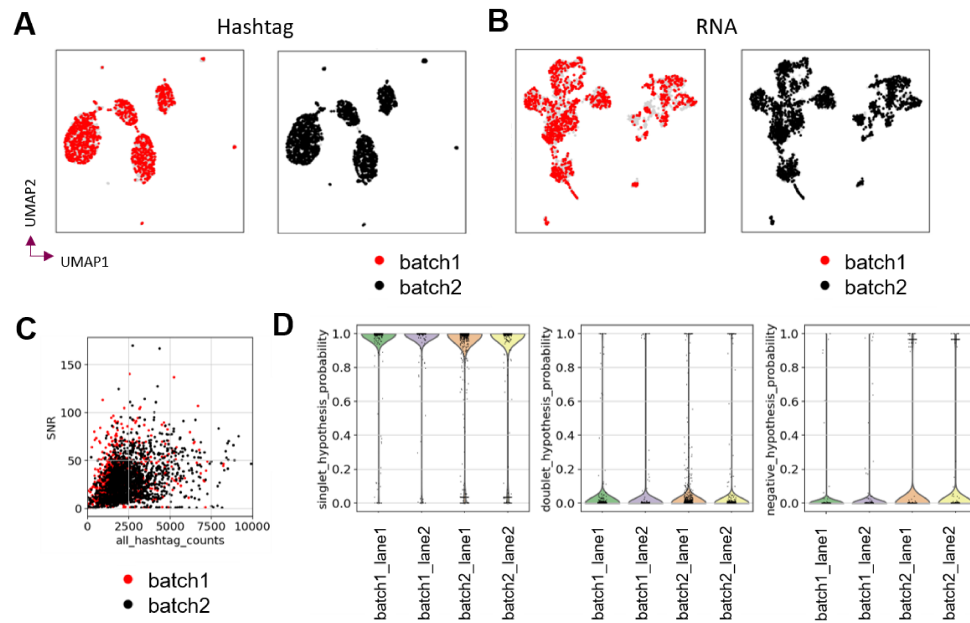

**Supplementary Figure 3: Optimising single cell RNA sequencing parameters for use with fine needle aspiration samples**

(A) Hashtag-embedded UMAP colored by batch. (B) RNA-embedded UMAPs colored by batch. (C) Number of hashtag counts per cell versus Signal-to-Noise Ratio (SNR) per cell. SNR was calculated for each cell as the most frequent hashtag count divided by all other hashtag counts. (D) Comparison of hashsolo probabilities of singlet, doublet/multiplet or negative assignment across the different batches and lanes.

## Supplementary Figure 4

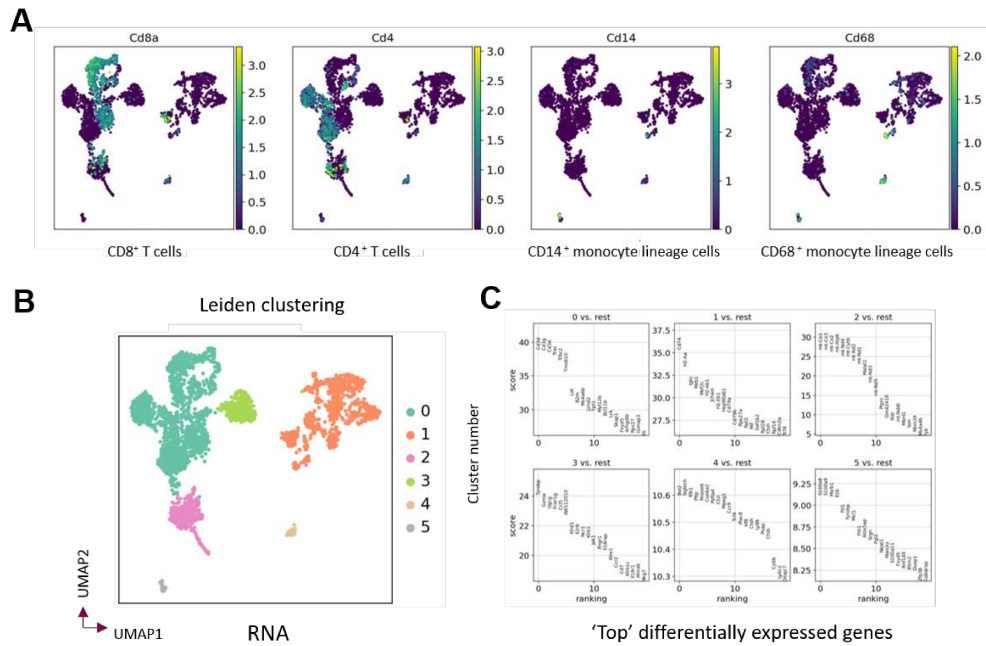**Supplementary Figure 4: Fine needle aspiration enables single cell RNA sequencing**

Expression of putative marker genes of immune cell types. **(B)** RNA UMAP colored by clustering annotation. **(C)** Top ranked (based on Z-score) differentially expressed genes between each cluster versus all other clusters.

## Supplementary Figure 5

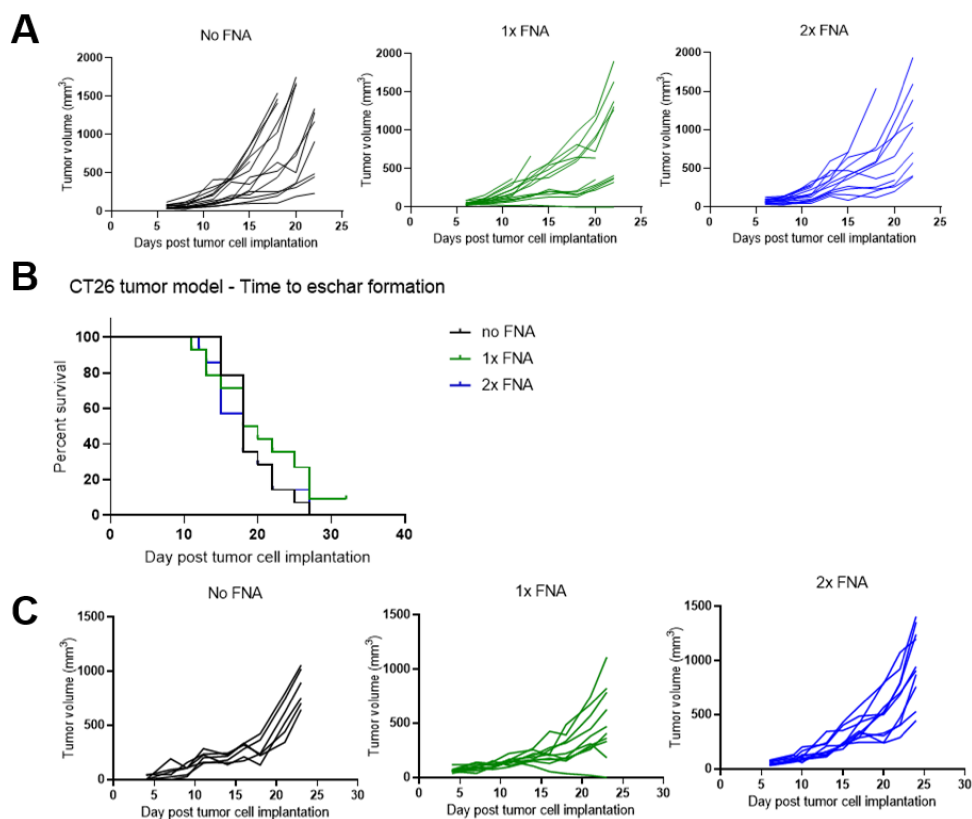

**Supplementary Figure 5: Repeated fine needle aspiration does not impact tumor growth or eschar formation**

(A and B) Mice were subcutaneously implanted with CT26 tumors on the flank and the tumors were biopsied using FNA either 12 days later (1x FNA group) or 12 and 14 days later (2x FNA group). (A) Tumor growth of individual mice over time. (B) Time to eschar formation was compared between groups using a log-rank test. No significant differences were seen between FNA-biopsied and control groups. (C) Mice were subcutaneously implanted with A20 tumors on the flank and the tumors were sampled using FNA either 15 days later (1x FNA group) or 13 and 15 days later (2x FNA group). Tumor growth of individual mice over time.

## Supplementary Figure 6

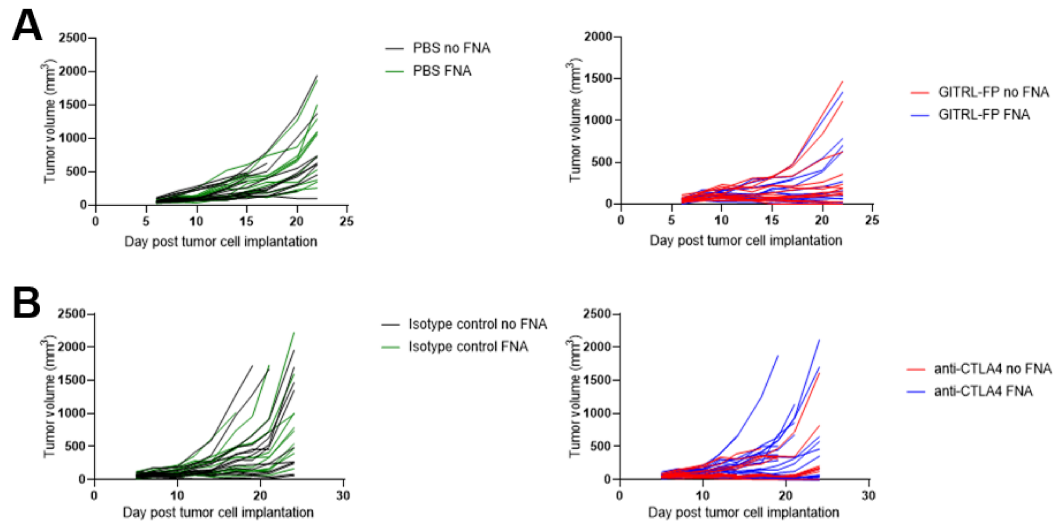**Supplementary Figure 6: Fine needle aspiration does not affect response to immuno-oncology treatments**

(A) CT26 tumor-bearing mice were treated with 0.2mg/kg GITRL-FP on day 6 and half of the mice were biopsied using FNA on day 14. Tumor growth of individual mice over time. (B) CT26 tumor-bearing mice were treated with 10mg/kg anti-CTLA-4 antibody or isotype control twice weekly from day 7 for 6 doses and half of the mice were biopsied using FNA on day 14. Tumor growth of individual mice over time.

## Supplementary Figure 7

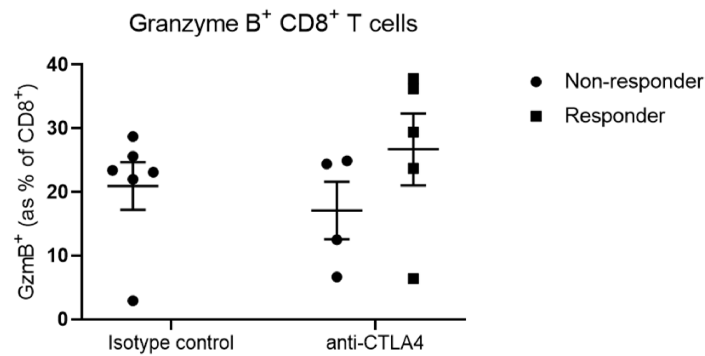**Supplementary Figure 7: Fine needle aspiration enables intracellular cytokine staining**

CT26 tumor-bearing mice were treated with 10mg/kg anti-CTLA-4 antibody or isotype control twice weekly from day 7 for 6 doses and the tumors were biopsied using FNA on day 17. Flow cytometric analysis of the FNA biopsies was used to quantify the frequency of Granzyme B-expressing CD8<sup>+</sup> T cells after subdividing the treated group into responder and non-responder groups *post hoc* based on the outcome of the tumor growth inhibition study.

## Supplementary Figure 8

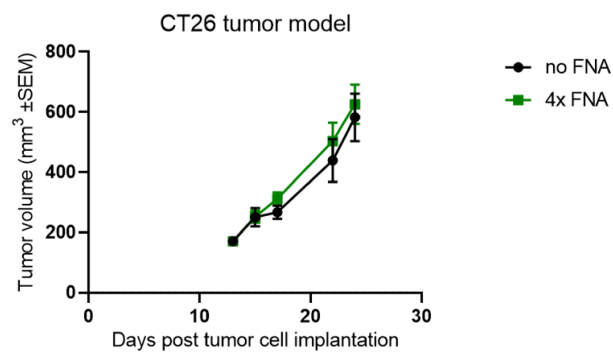**Supplementary Figure 8: Fine needle aspiration can be carried out four times without impacting tumor growth**

Mice were subcutaneously implanted with CT26 tumors on the flank and the tumors were biopsied using FNA 12, 15, 18 and 21 days later (4x FNA group). Tumor growth over time was compared between groups using a mixed effects model. No significant differences were seen between FNA-biopsied and control groups. Error bars indicate the mean  $\pm$  SEM. 10 mice per group.



## Supplementary Figure 9

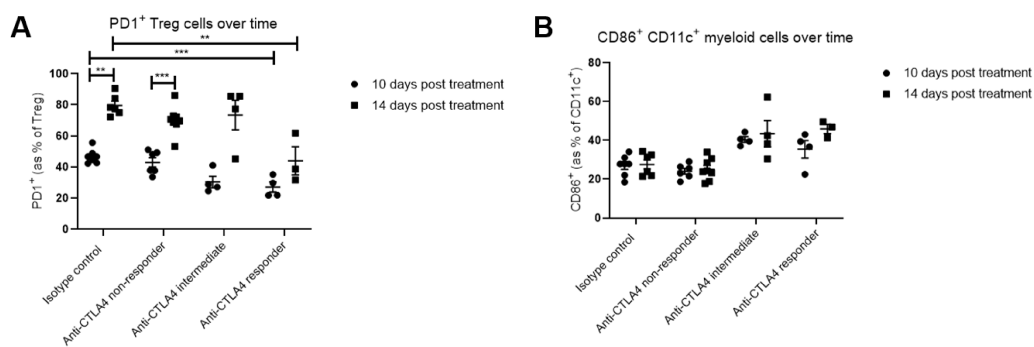

**Supplementary Figure 9: Repeated fine needle aspiration enables comparison of the TME at several timepoints after treatment**

CT26 tumor-bearing mice were treated with 10mg/kg anti-CTLA-4 antibody or isotype control twice weekly from day 7 for 6 doses and the tumors were biopsied using FNA on day 17 (10 days post treatment initiation) and day 21 (14 days post treatment initiation). Flow cytometric analysis of the FNA biopsies was used to compare (A) the frequency of PD1-expressing Treg cells and (B) the frequency of CD86-expressing CD11c<sup>+</sup> myeloid cells after subdividing the treated group into responder, intermediate and non-responder groups *post hoc* based on the outcome of the tumor growth inhibition study. The 2 timepoints were compared using Mann-Whitney tests with multiple comparison correction. For each timepoint, the treatment groups were compared using a one-way ANOVA with Tukey's multiple comparison testing. Error bars indicate the mean  $\pm$  SEM. \*\*  $P < 0.01$ , \*\*\*  $P < 0.001$ .

**A**

| Batch | Library Type | Estimated Number of Cells | Mean Reads per Cell | Median Genes per Cell | Number of Reads | Valid Barcodes | Sequencing Saturation | Q30 Bases in Barcode | Q30 Bases in RNA Read | Q30 Bases in Sample Index | Q30 Bases in UMI | Reads Mapped Confidently to genome | Reads Mapped Confidently to Intergenic Regions | Reads Mapped Confidently to Intronic Regions | Reads Mapped Confidently to Exonic Regions | Reads Mapped Confidently to Transcriptome | Reads Mapped to Antisense to Gene | Fraction Reads in Cells | Total Genes Detected | Median UMIs per Cell |
|-------|--------------|---------------------------|---------------------|-----------------------|-----------------|----------------|-----------------------|----------------------|-----------------------|---------------------------|------------------|------------------------------------|------------------------------------------------|----------------------------------------------|--------------------------------------------|-------------------------------------------|-----------------------------------|-------------------------|----------------------|----------------------|
| 1     | RNA          | 1,098                     | 371,898             | 1,915                 | 408,344,185     | 97,80%         | 94,10%                | 95,70%               | 93,50%                | 94,90%                    | 91,10%           | 84,90%                             | 4,00%                                          | 21,40%                                       | 59,50%                                     | 56,80%                                    | 1,20%                             | 86,20%                  | 16,742               | 5,296                |
| 2     | RNA          | 2,053                     | 104,129             | 1,933                 | 207,618,619     | 97,70%         | 79,40%                | 95,70%               | 93,60%                | 94,90%                    | 92,20%           | 86,40%                             | 3,80%                                          | 21,80%                                       | 60,70%                                     | 58,00%                                    | 1,10%                             | 88,10%                  | 17,467               | 5,269                |

**B**

| Batch | Library Type | Number of Reads | Mean Reads per Cell | Valid Barcodes | Sequencing Saturation | Q30 Bases in Barcode | Q30 Bases in Antibody Read | Q30 Bases in Sample Index | Q30 Bases in UMI | Fraction Antibody Reads | Fraction Antibody Reads Usable | Antibody Reads Usable per Cell | Fraction Reads in High UMI Counts | Fraction Unrecognized Antibody | Antibody Reads in Cells | Median UMIs per Cell (summed over all recognized antibody barcodes) |
|-------|--------------|-----------------|---------------------|----------------|-----------------------|----------------------|----------------------------|---------------------------|------------------|-------------------------|--------------------------------|--------------------------------|-----------------------------------|--------------------------------|-------------------------|---------------------------------------------------------------------|
| 1     | Antibody     | 7,116,195       | 6,481               | 99,10%         | 51,50%                | 96,10%               | 96,00%                     | 90,80%                    | 96,30%           | 87,30%                  | 58,00%                         | 3,759                          | 0,00%                             | 12,70%                         | 66,80%                  | 1,586                                                               |
| 2     | Antibody     | 16,431,509      | 8,003               | 99,10%         | 57,10%                | 96,00%               | 96,00%                     | 91,30%                    | 96,20%           | 91,30%                  | 69,20%                         | 5,539                          | 0,00%                             | 8,70%                          | 76,20%                  | 2,072                                                               |

Supplementary Table 1: QC metrics for scRNAseq per batch

Quality control metrics from cellranger count for each batch for (A) RNA and (B) antibody hashtag.

| A     |      |              |                           |                     |                       |                       |                      |                            |                           |                       |                                |                                |                                                 |                                                |                                              |                                                                     | B                                         |                                |                         |                      |                            |       |
|-------|------|--------------|---------------------------|---------------------|-----------------------|-----------------------|----------------------|----------------------------|---------------------------|-----------------------|--------------------------------|--------------------------------|-------------------------------------------------|------------------------------------------------|----------------------------------------------|---------------------------------------------------------------------|-------------------------------------------|--------------------------------|-------------------------|----------------------|----------------------------|-------|
| Batch | Lane | Library Type | Estimated Number of Cells | Mean Reads per Cell | Median Genes per Cell | Number of Reads       | Valid Barcodes       | Sequencing Saturation      | Q30 Bases in Barcode      | Q30 Bases in RNA Read | Q30 Bases in Sample Index      | Q30 Bases in UMI               | Reads Mapped Confidently to Genome              | Reads Mapped Confidently to Intergenic Regions | Reads Mapped Confidently to Intronic Regions | Reads Mapped Confidently to Exonic Regions                          | Reads Mapped Confidently to Transcriptome | Reads Mapped Antisense to Gene | Fraction Reads in Cells | Total Genes Detected | Median UMI Counts per Cell |       |
| 1     | 1    | RNA          | 1,076                     | 184,313             | 1,863                 | 198,221,366           | 97.80%               | 88.80%                     | 95.90%                    | 93.70%                | 95.90%                         | 95.00%                         | 91.10%                                          | 84.90%                                         | 4.00%                                        | 21.30%                                                              | 59.60%                                    | 56.90%                         | 1.20%                   | 86.10%               | 16,448                     | 5,133 |
| 1     | 2    | RNA          | 1,075                     | 195,370             | 1,870                 | 210,022,819           | 97.70%               | 89.40%                     | 95.60%                    | 93.30%                | 95.50%                         | 94.70%                         | 91.10%                                          | 85.00%                                         | 4.00%                                        | 21.40%                                                              | 59.50%                                    | 56.80%                         | 1.20%                   | 86.20%               | 16,479                     | 5,153 |
| 2     | 1    | RNA          | 1,943                     | 52,460              | 1,757                 | 101,931,446           | 97.70%               | 65.20%                     | 95.80%                    | 93.80%                | 96.30%                         | 95.00%                         | 92.20%                                          | 86.40%                                         | 3.80%                                        | 21.70%                                                              | 60.80%                                    | 55.00%                         | 1.10%                   | 88.00%               | 16,954                     | 4,681 |
| 2     | 2    | RNA          | 1,937                     | 54,562              | 1,780                 | 105,887,173           | 97.70%               | 66.00%                     | 95.90%                    | 93.40%                | 95.90%                         | 94.70%                         | 92.20%                                          | 86.40%                                         | 3.80%                                        | 21.80%                                                              | 60.70%                                    | 57.90%                         | 1.20%                   | 88.10%               | 17,001                     | 4,732 |
| Batch | Lane | Library Type | Number of Reads           | Mean Reads per Cell | Valid Barcodes        | Sequencing Saturation | Q30 Bases in Barcode | Q30 Bases in Antibody Read | Q30 Bases in Sample Index | Q30 Bases in UMI      | Fraction Antibody Reads Usable | Antibody Reads Usable per Cell | Fraction Reads in Barcodes with High UMI Counts | Fraction Reads Unrecognized Antibody           | Antibody Reads in Cells                      | Median UMIs per Cell (summed over all recognized antibody barcodes) |                                           |                                |                         |                      |                            |       |
| 1     | 1    | Antibody     | 4,942,840                 | 4,593               | 99.10%                | 42.70%                | 96.20%               | 96.00%                     | 91.00%                    | 96.40%                | 87.30%                         | 2,661                          | 0.00%                                           | 12.70%                                         | 66.80%                                       | 1,309                                                               |                                           |                                |                         |                      |                            |       |
| 1     | 2    | Antibody     | 2,173,355                 | 2,021               | 99.00%                | 26.90%                | 95.90%               | 95.90%                     | 90.40%                    | 96.10%                | 87.40%                         | 1,172                          | 0.00%                                           | 12.60%                                         | 66.80%                                       | 724                                                                 |                                           |                                |                         |                      |                            |       |
| 2     | 1    | Antibody     | 11,179,458                | 5,753               | 99.10%                | 47.40%                | 96.10%               | 96.00%                     | 91.50%                    | 96.30%                | 91.30%                         | 3,945                          | 0.00%                                           | 8.70%                                          | 75.60%                                       | 1,765                                                               |                                           |                                |                         |                      |                            |       |
| 2     | 2    | Antibody     | 5,252,051                 | 2,711               | 99.10%                | 31.00%                | 95.80%               | 96.00%                     | 91.00%                    | 96.10%                | 91.40%                         | 1,863                          | 0.00%                                           | 8.60%                                          | 75.70%                                       | 1,083                                                               |                                           |                                |                         |                      |                            |       |

**Supplementary Table 2: QC metrics for scRNAseq per lane**

Quality control metrics from cellranger count for each batch split by lane for (A) RNA and (B) antibody hashtag.
